# Supplementary material
Source: Research Square preprint supplement (doi:10.21203/rs.3.rs-9247735/v1)
Supplement: Supplementary file 1 [file 899f55ff2f81cfe7e662e7db.docx]

**Supplementary Table 1. Secondary motor and non-motor outcomes at T0, T1, T2 and T3.**

|  |  | **T0** | | **T1** | | **T2** | | **T3** | | **Mixed ANOVA** |
| --- | --- | --- | --- | --- | --- | --- | --- | --- | --- | --- |
| **Outcome** | Group | Mean | (SD) | Mean | (SD) | Mean | (SD) | Mean | (SD) |  |
| S-FMDRS | CG | 14.87 | (8.41) | 13.00 | (8.98) | 5.50 | (6.37) | 6.58 | (8.03) | T p < 0.001* |
|  | EG | 13.53 | (7.61) | 7.53 | (8.36) | 5.50 | (6.09) | 3.43 | (4.03) | T×G p = 0.32  G p= 0.160 |
| BAI | CG | 14.00 | (7.45) |  |  | 14.50 | (7.35) | 13.67 | (7.96) | T p < 0.001* |
|  | EG | 21.67 | (10.44) |  |  | 14.79 | (9.46) | 14.00 | (10.76) | T×G p = 0.02* |
|  |  |  |  |  |  |  |  |  |  | G p = 0.39 |
| BDI-II | CG | 8.00 | (5.25) |  |  | 8.50 | (6.69) | 8.00 | (7.10) | T p= 0.06 |
|  | EG | 16.00 | (9.17) |  |  | 9.36 | (9.57) | 9.86 | (10.32) | T×G p= 0.05 |
|  |  |  |  |  |  |  |  |  |  | G p= 0.19 |
| BPI Intensity | CG | 11.13 | (12.89) | 8.40 | (10.71) | 12.50 | (14.31) | 13.83 | (13.84) | T p= 0.53 |
|  | EG | 15.53 | (10.15) | 13.13 | (10.72) | 13.14 | (12.37) | 14.07 | (13.77) | T×G = 0.63 |
|  |  |  |  |  |  |  |  |  |  | G = 0.65 |
| BPI Interference | CG | 7.33 | (13.94) | 4.00 | (7.20) | 15.67 | (18.89) | 16.08 | (20.68) | T p= 0.02* |
|  | EG | 24.93 | (18.52) | 13.67 | (14.98) | 18.00 | (17.25) | 17.21 | (17.35) | T×G p= 0.02* |
|  |  |  |  |  |  |  |  |  |  | G p= 0.21 |
| MFI 20 Global | CG | 14.00 | (4.84) | 10.21 | (4.34) | 13.83 | (3.76) | 13.42 | (4.72) | T p < 0.001* |
|  | EG | 15.71 | (3.60) | 12.50 | (4.00) | 13.58 | (5.23) | 11.69 | (5.89) | T×G p= 0.10 |
|  |  |  |  |  |  |  |  |  |  | G p= 0.48 |
| MFI 20 Physical | CG | 13.07 | (4.48) | 10.29 | (4.10) | 12.92 | (4.10) | 12.08 | (4.89) | T p= 0.02* |
|  | EG | 14.93 | (3.93) | 10.93 | (3.69) | 12.17 | (4.34) | 12.54 | (7.87) | T×G p= 0.42 |
|  |  |  |  |  |  |  |  |  |  | G p= 0.45 |
| MFI 20 Activity | CG | 11.36 | (4.22) | 9.71 | (3.81) | 11.50 | (4.06) | 10.92 | (3.26) | T p < 0.001* |
|  | EG | 14.21 | (4.46) | 10.57 | (3.52) | 10.50 | (4.89) | 10.46 | (4.75) | T×G p= 0.15 |
|  |  |  |  |  |  |  |  |  |  | G p= 0.62 |
| MFI 20 Motivation | CG | 7.93 | (2.34) | 7.43 | (3.23) | 8.08 | (4.12) | 7.83 | (3.41) | T p < 0.001* |
|  | EG | 9.86 | (3.55) | 6.43 | (2.50) | 7.25 | (2.42) | 7.46 | (3.23) | T×G p= 0.06 |
|  |  |  |  |  |  |  |  |  |  | G p= 0.72 |
| MFI 20 Mental | CG | 11.14 | (4.75) | 9.86 | (4.90) | 11.67 | (4.52) | 10.50 | (3.99) | T p= 0.49 |
|  | EG | 11.71 | (4.66) | 11.50 | (4.45) | 10.75 | (4.56) | 9.69 | (4.66) | T×G p= 0.57 |
|  |  |  |  |  |  |  |  |  |  | G p= 0.76 |

**Legend:** *Statistically significant; P value adjusted for multiple comparisons. ANOVA, analysis of variance; BPI, Brief Pain Inventory; EG, Experimental GroupCG, Control Group;MFI ­ 20, Multidimensional Fatigue Inventory ­ 20; S - FMDRS, Simplified Functional Movement Disorders Rating Scale; T0, before rehabilitation; T1, post-treatment; T2, 12- week follow- up; T3, 24- week follow- up; T×G, time × group interaction.

**Supplementary Table 2. Quality of life outcomes.**

|  |  | T0 | | T1 | | T2 | | T3 | | Mixed ANOVA |
| --- | --- | --- | --- | --- | --- | --- | --- | --- | --- | --- |
| Outcome | Group | Mean | SD | Mean | SD | Mean | SD | Mean | SD |  |
| EQ 5D | CG |  |  | 69.00 | (12.42) | 64.55 | (13.31) | 66.82 | (18.20) | T p= 0.08 |
|  | EG |  |  | 74.40 | (13.36) | 65.00 | (14.68) | 71.43 | (18.96) | T×G p= 0.78 |
|  |  |  |  |  |  |  |  |  |  | G p= 0.65 |
|  |  |  |  |  |  |  |  |  |  |  |
| SF - 12 PCS | CG | 35.30 | (10.58) |  |  | 38.21 | (10.75) | 40.03 | (11.64) | T p < 0.001* |
|  | EG | 30.19 | (6.76) |  |  | 38.11 | (13.69) | 40.09 | (12.59) | T×G p= 0.02* |
|  |  |  |  |  |  |  |  |  |  | G p= 0.51 |
|  |  |  |  |  |  |  |  |  |  |  |
| SF – 12 MCS | CG | 45.61 | (10.24) |  |  | 41.97 | (10.54) | 42.25 | (10.49) | T p= 0.055 |
|  | EG | 41.70 | (11.52) |  |  | 48.49 | (11.49) | 47.96 | (12.85) | T×G p= 0.09 |
|  |  |  |  |  |  |  |  |  |  | G p= 0.41 |

Legend: Statistically significant; P value adjusted for multiple comparisons. ANOVA, analysis of variance; SF-12, 12-item Short Form Health Survey; PCS, Physical Component Summary; MCS, Mental Component Summary; T0, before rehabilitation; T1, post-treatment; T2, 12- week follow- up; T3, 24- week follow- up; T×G, time×group interaction.
